# Supplementary figures and images for: Using Model‐Based “Learn and Confirm” to Reveal the Pharmacokinetics‐Pharmacodynamics Relationship of Pembrolizumab in the KEYNOTE‐001 Trial
Source: PubMed Central journal article supplement — CPT Pharmacometrics Syst Pharmacol. 2016 Nov 8;6(1):21–8. doi: 10.1002/psp4.12132 (PMC5270295; doi:10.1002/psp4.12132), 2016-11-08

Average of largest RMSE% per design

Design A Design B Design C

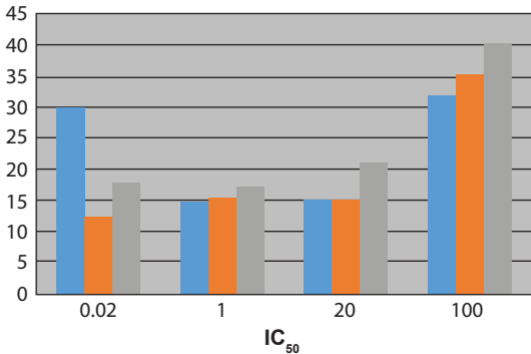

Supplement: PSP4-6-21-s005.pdf [file PSP4-6-21-s005.pdf]

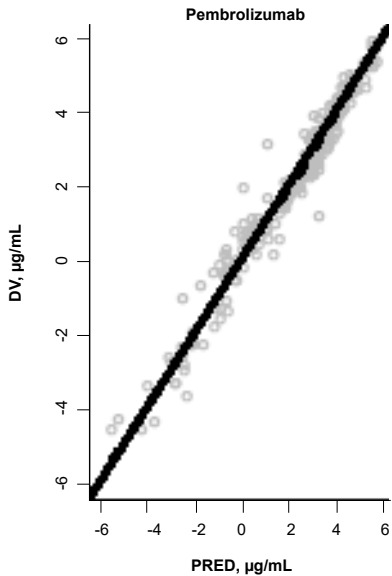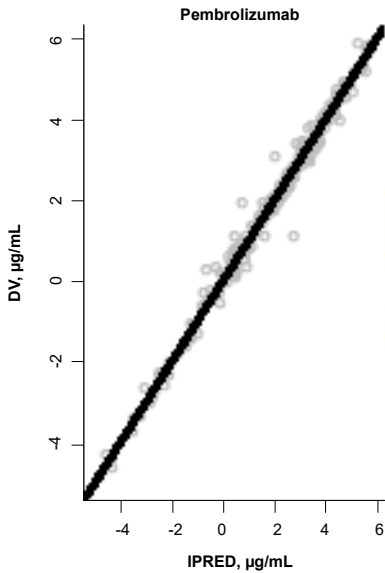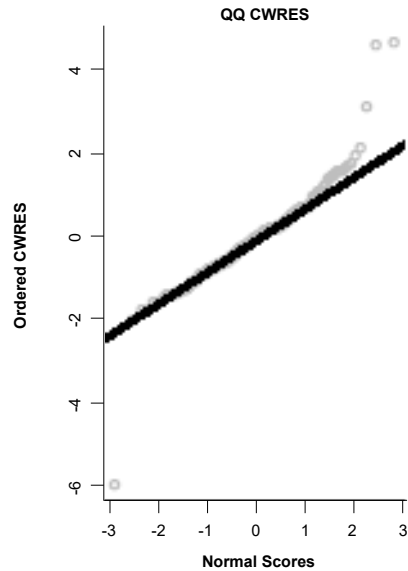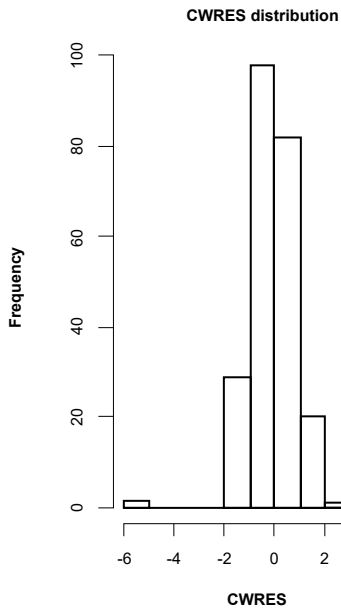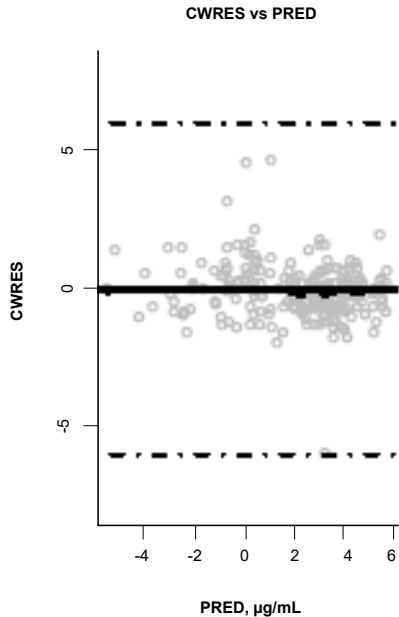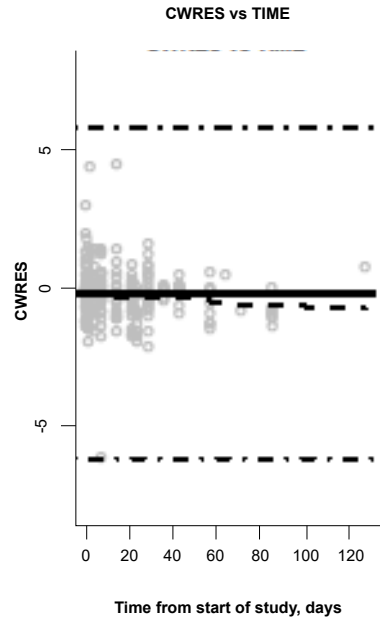

Supplement: PSP4-6-21-s006.pdf [file PSP4-6-21-s006.pdf]

# Q3W

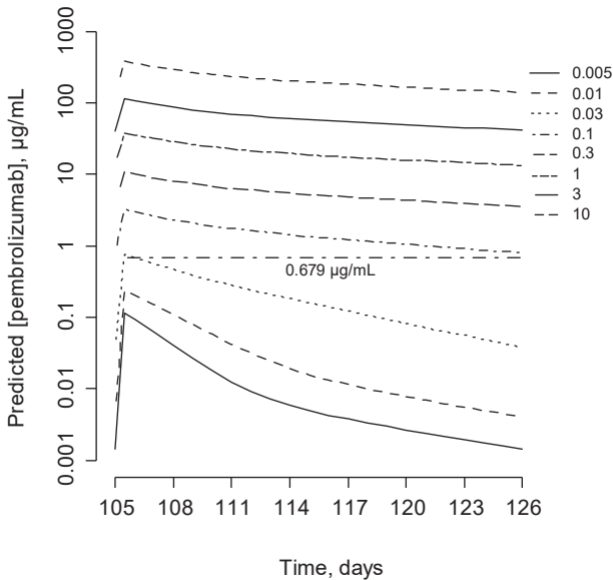

Supplement: PSP4-6-21-s007.pdf [file PSP4-6-21-s007.pdf]

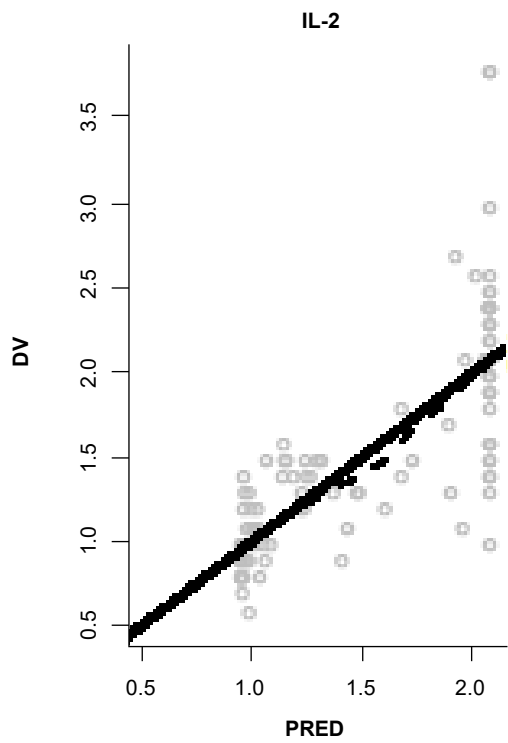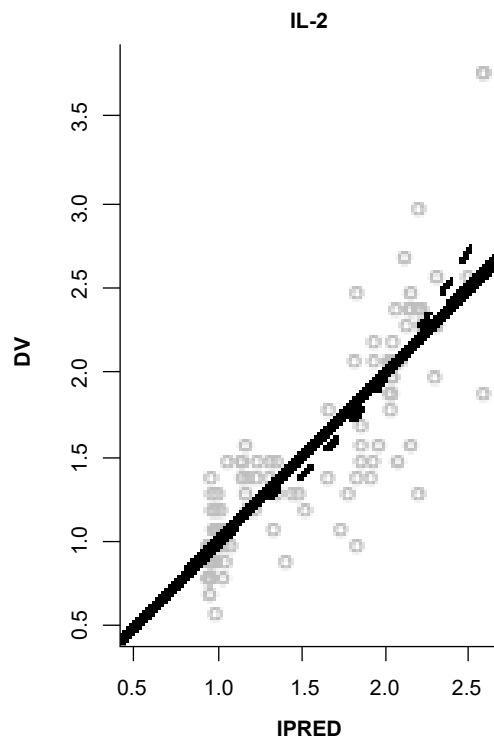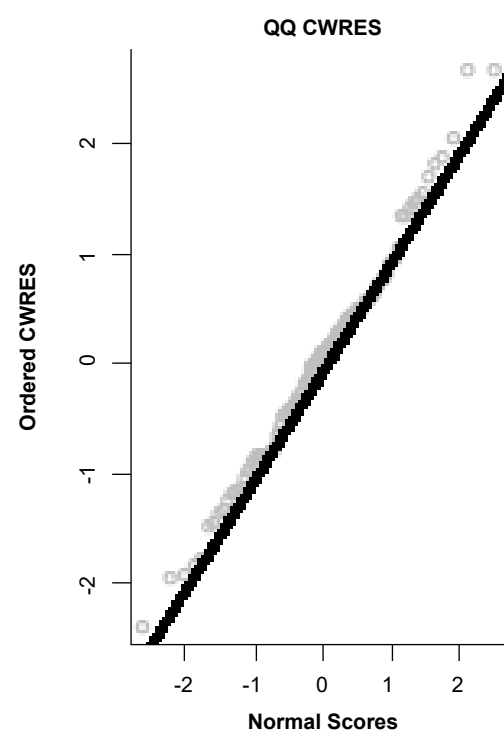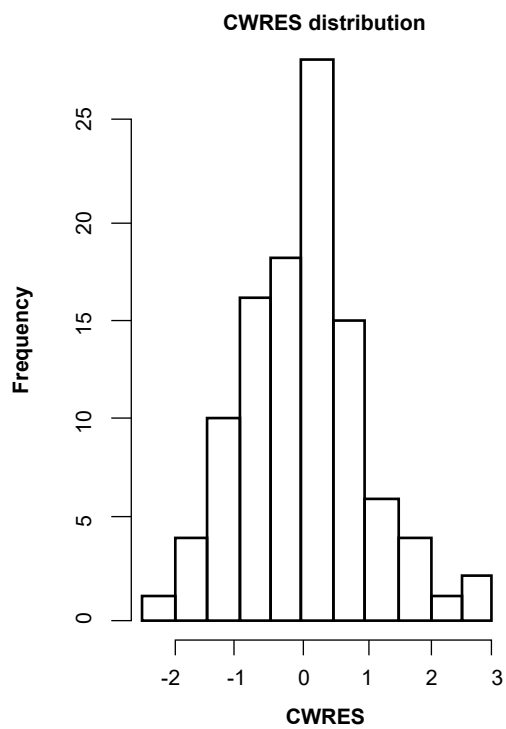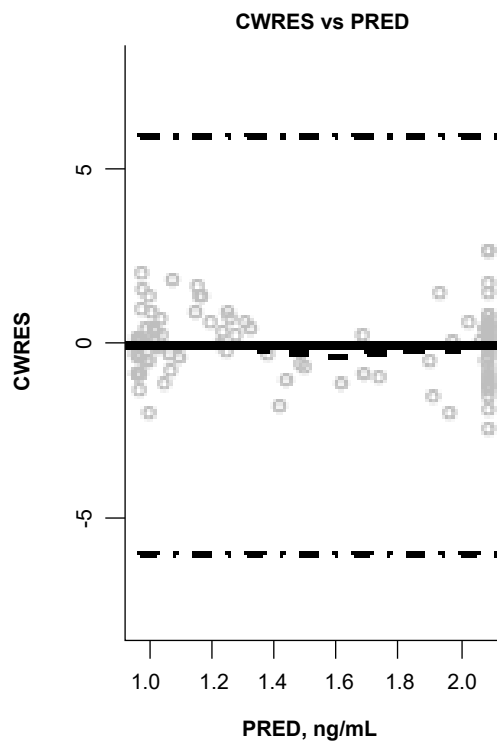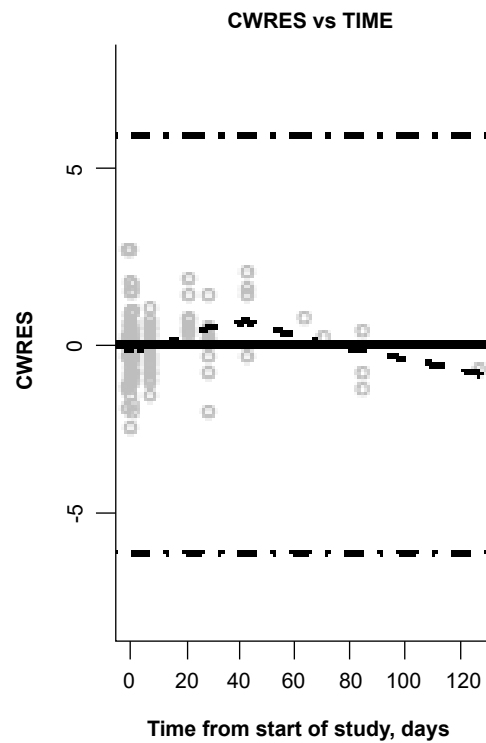

Supplement: PSP4-6-21-s008.pdf [file PSP4-6-21-s008.pdf]

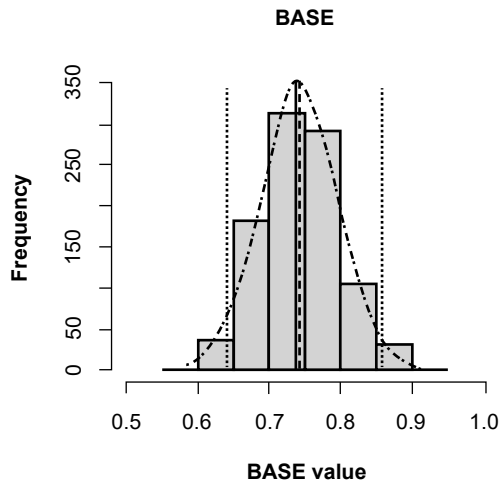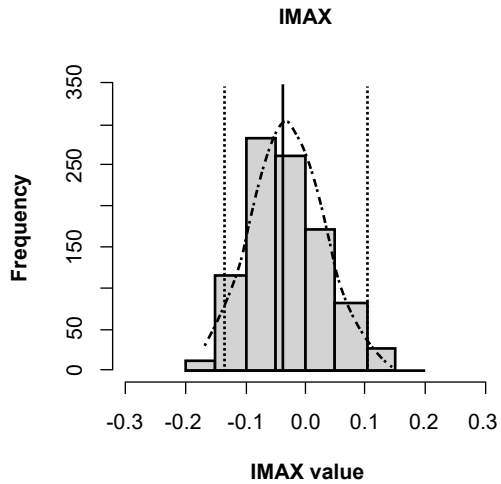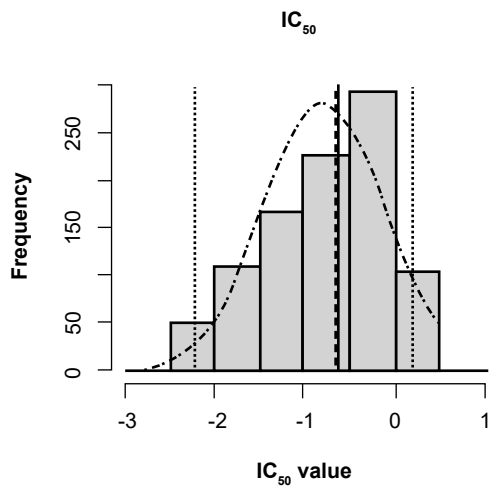

Supplement: PSP4-6-21-s009.pdf [file PSP4-6-21-s009.pdf]
